# Supplementary material for: Modulating the localized electronic distribution of Cu species during reconstruction for enhanced electrochemical CO2 reduction to C2+ products
Source: Royal Society of Chemistry journal article supplement (doi:10.1039/d4ta01184h), 2024-01-01
Supplement: d4ta01184h1.pdf [file d4ta01184h1.pdf]

# **Modulating the localized electronic distribution of Cu species during reconstruction for enhanced electrochemical CO<sub>2</sub> reduction to C<sub>2+</sub> products**

Zongmiao Li,<sup>‡ab</sup> Zhu Liu,<sup>‡b</sup> Shiju Li,<sup>a</sup> Yuhou Pei,<sup>ab</sup> Di Li,<sup>ab</sup> Jiale Mao,<sup>ab</sup> Rong Zhou,<sup>c</sup> Chuntian Qiu,<sup>b</sup> Yingying Lu,<sup>\*ab</sup> and Bing Zhang<sup>\*ab</sup>

<sup>a</sup> State Key Laboratory of Chemical Engineering, College of Chemical and Biological Engineering, Institute of Pharmaceutical Engineering, Zhejiang University, Hangzhou, 310027, P. R. China. E-mail: bzhang219@zju.edu.cn, yingyinglu@zju.edu.cn.

<sup>b</sup> ZJU-Hangzhou Global Scientific and Technological Innovation Center, Zhejiang University, Hangzhou, 311215, P.R. China.

<sup>c</sup> College of Chemistry and Chemical Engineering, Xinjiang Agricultural University, Urumqi, 830052, China.

<sup>‡</sup> These authors contributed equally.

## **Table of contents**

**Faradaic efficiency calculation. Pag. 3**

**DFT calculations. Pag. 3-4**

**Results. Pag. 5-27**

**Supporting references. Pag. 28**

## Faradaic efficiency calculation

All electrochemical measurements were run at 25 °C in a home-made flow cell with a typical three-electrode configuration: CuO-ZrO<sub>2-x</sub> coated GDE, platinum foil, saturated Ag/AgCl were used as the working electrode, counter electrode and reference electrode, respectively. The anion exchange membrane was used to separate the anolyte and catholyte chamber both filled with 1 M KOH. A CHI660E electrochemical workstation was employed to record the electrochemical response. All potentials measured against Ag/AgCl were converted to the RHE (reversible hydrogen electrode) in this work according equation  $E(\text{vs. RHE}) = E(\text{vs. Ag/AgCl}) + 0.199V + 0.059 \times \text{pH} - 0.85iR$ , where R was measured by electrochemical impedance spectroscopy (EIS). During the electrochemical tests, the flow rate of CO<sub>2</sub> was 25 sccm, and the electrolyte flow rates for cathode and anode were 15 mL min<sup>-1</sup> and 20 mL min<sup>-1</sup> respectively. The gaseous products of CO<sub>2</sub>RR were quantified by online gas chromatograph and the liquid products were analyzed by the <sup>1</sup>H NMR spectroscopy, where DMSO and D<sub>2</sub>O were used as the reference standard and the deuterated solvent. The Faradaic efficiency (FE) of gas product was calculated by the following equation:

$$FE_g = x_i \times v \times \frac{n_i F P}{RT} \times \frac{1}{j_{total}} \times 100\%$$

where  $x_i$  is the volume fraction of gas product determined by online GC referenced to the calibrated standard product,  $v$  is the gas flow rate,  $n_i$  is the number of electrons required to produce one molecule of product  $i$ ,  $F$  is the Faraday constant (96485 C mol<sup>-1</sup>),  $P$  is the atmosphere pressure,  $R$  is the ideal gas constant,  $T$  is the temperature, and  $j_{total}$  is the total current.

The FE of liquid products was calculated by the following equation:

$$FE_{liquid} = y_i \times \frac{n_i F}{Q} \times 100\%$$

where  $y_i$  is the moles of product  $i$ ,  $Q$  is the cumulative charge as the liquid products collected.

## Density functional theory calculations

Spin-polarized density functional theory (DFT) calculations were conducted with the Vienna ab initio Simulation Program (VASP),<sup>[1-2]</sup> using the Perdew-Burke-Ernzerhof (PBE) functional<sup>[3]</sup> within the generalized gradient approximation, along with the projected augmented wave (PAW) pseudopotentials<sup>[4]</sup> to treat the exchange-correlation energy interactions among electrons. In order to simulate the adsorption of intermediates on the modelling system, the suggested oriented crystallographic facet (110) of Cu<sub>2</sub>O cubical phase from the TEM and XRD characterization was adopted to generate the interface between Cu<sub>2</sub>O and ZrO<sub>2</sub> by doping a Zr atom into the Cu<sub>2</sub>O (110) slab, as shown in Figure S19. To vary the tendency of the oxidation state of the surface Cu in contact with ZrO<sub>2</sub>, the Bader charges analysis was performed given that the Bader charge qualitatively corresponds to the oxidation state, which is shown in Figure

4f in the main text. The amount of charge transfer from Cu to Zr atoms is computed by Bader charge analysis according to the equation:

$$Q_{Cu} = Z_{Cu} - q_{Bader},$$

where  $Z$  and  $q$  represent the number of valence electrons and the values of Bader charges of the Cu atom.<sup>[5-6]</sup>

The modelling system, as shown in Figure S19, was constructed by a four-layer slab with a vacuum region of 20 Å along the  $z$ -axis to minimize the periodic image interactions. An energy cutoff was set to 450 eV to expand the wave functions. Brillouin zone integration was sampled with  $2 \times 4 \times 1$  Monkhorst-Pack mesh  $k$ -points grids<sup>[7]</sup> for geometry optimizations and  $10 \times 20 \times 1$   $k$ -points grids for electronic property calculations, respectively. All geometries were fully optimized until the convergence criteria of forces and energies reach 0.015 eV/Å for the forces and  $1 \times 10^{-4}$  eV for the energies on all atoms. The slab-to-slab dipole corrections were included in the perpendicular direction along the surface of the slab model.<sup>[8-9]</sup> The adsorption energies ( $E_{ad}$ ) of intermediates on the Cu<sub>2</sub>O-ZrO<sub>2</sub> surface are estimated according to the following equation:

$$E_{ad} = E_{surf+im} - E_{surf} - E_{im},$$

where  $E_{surf+im}$  represents the total energy of the intermediates adsorbed on the surface,  $E_{surf}$  is the energy of the Cu<sub>2</sub>O-ZrO<sub>2</sub> (110) surface and  $E_{im}$  is the energy of the respective isolated intermediate. The free energy of the adsorbed state is carried out as follows:

$$\Delta G_{*im} = \Delta E_{*im} + \Delta E_{ZPE} - T\Delta S,$$

where  $\Delta E_{ZPE}$  is the difference corresponding to the zero point energy and  $\Delta S$  is the entropy.

## Results

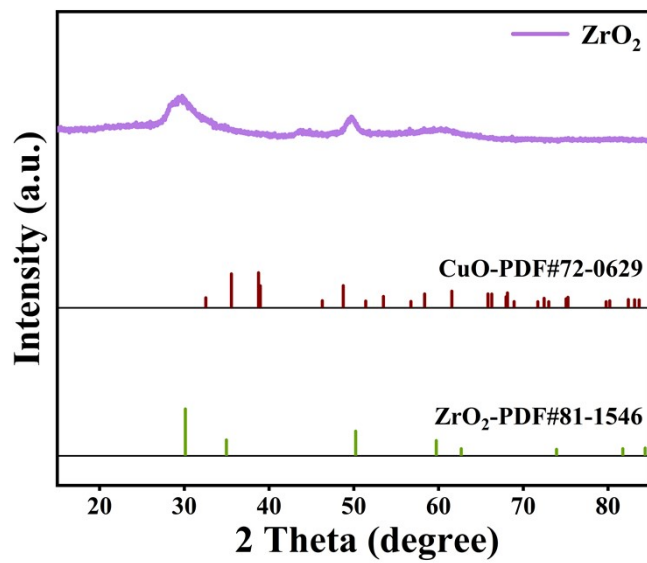

Supplementary Figure 1. XRD pattern of as-prepared ZrO<sub>2</sub>

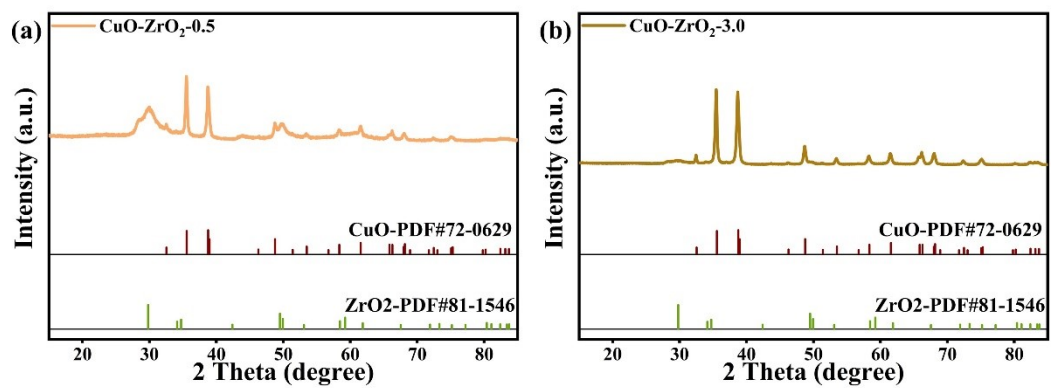

**Supplementary Figure 2.** XRD patterns of as-prepared CuO-ZrO<sub>2</sub>-0.5 (a) and CuO-ZrO<sub>2</sub>-3.0 (b).

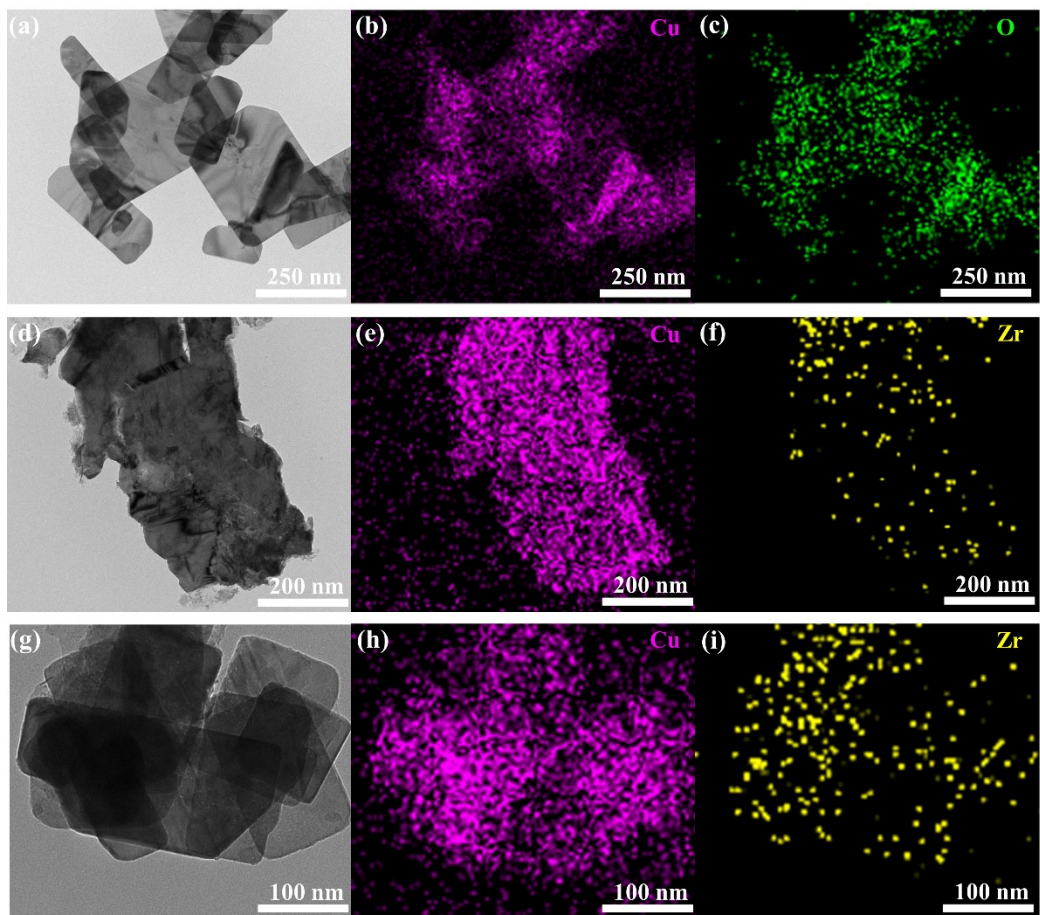

**Supplementary Figure 3.** The TEM images and corresponding EDS elemental mapping images of CuO (a, b and c), CuO-ZrO<sub>2</sub>-0.5 (d, e and f) and CuO-ZrO<sub>2</sub>-3.0 (g, h and i).

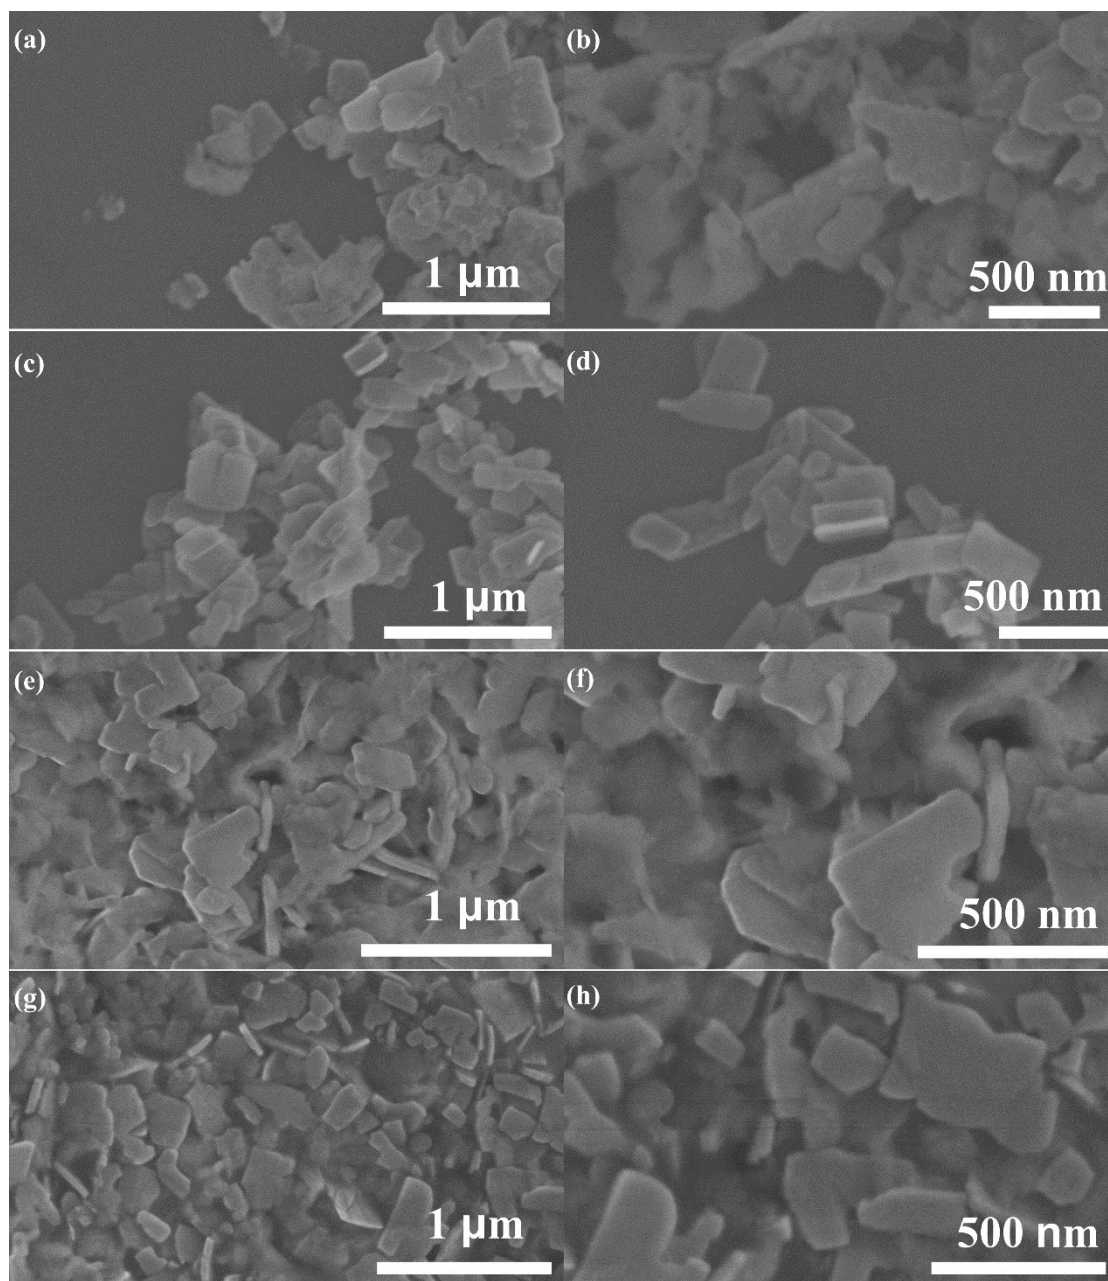

**Supplementary Figure 4.** The SEM images of CuO-ZrO<sub>2</sub>-1.0 (a, b), CuO (c, d), CuO-ZrO<sub>2</sub>-0.5 (e, f) and CuO-ZrO<sub>2</sub>-3.0 (g, h).



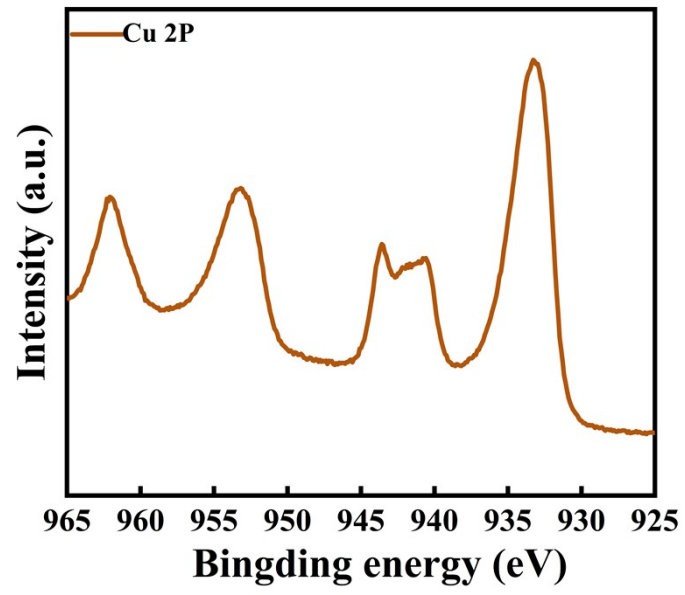

Supplementary Figure 5. Cu 2p XPS spectrum of CuO.

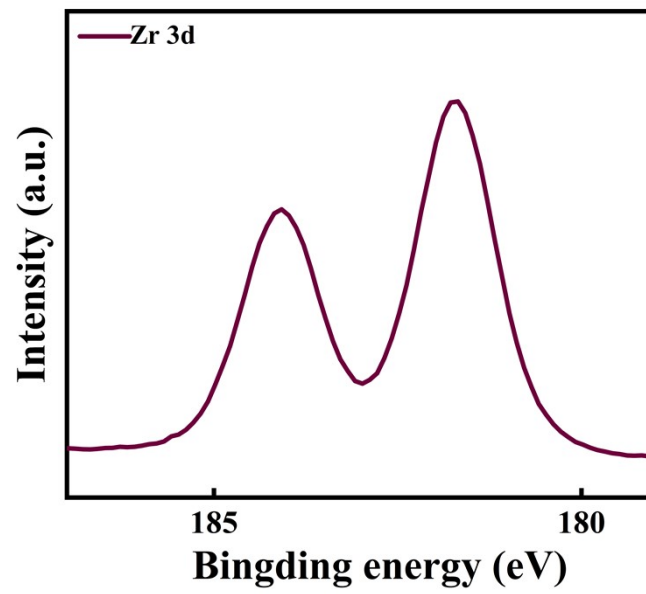

Supplementary Figure 6. Zr 3d XPS spectrum of ZrO<sub>2</sub>.

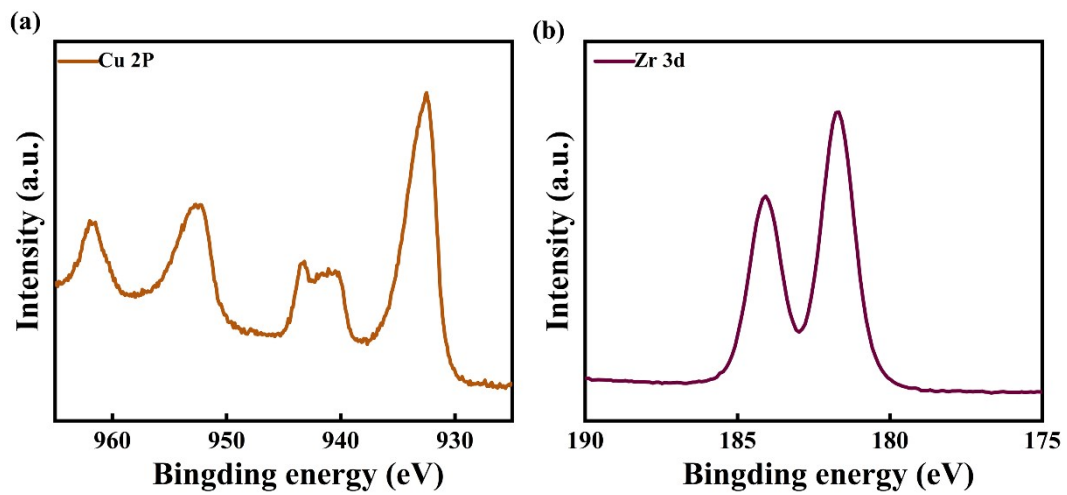

Supplementary Figure 7. Cu 2p (a) and Zr 3d (b) XPS spectra of CuO-ZrO<sub>2</sub>-0.5.

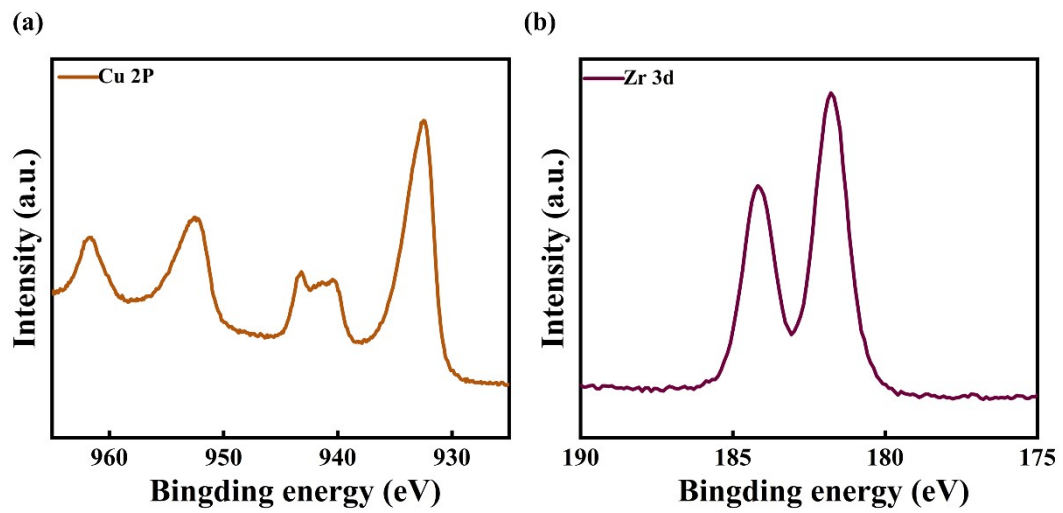

Supplementary Figure 8. Cu 2p (a) and Zr 3d (b) XPS spectra of CuO-ZrO<sub>2</sub>-3.0.

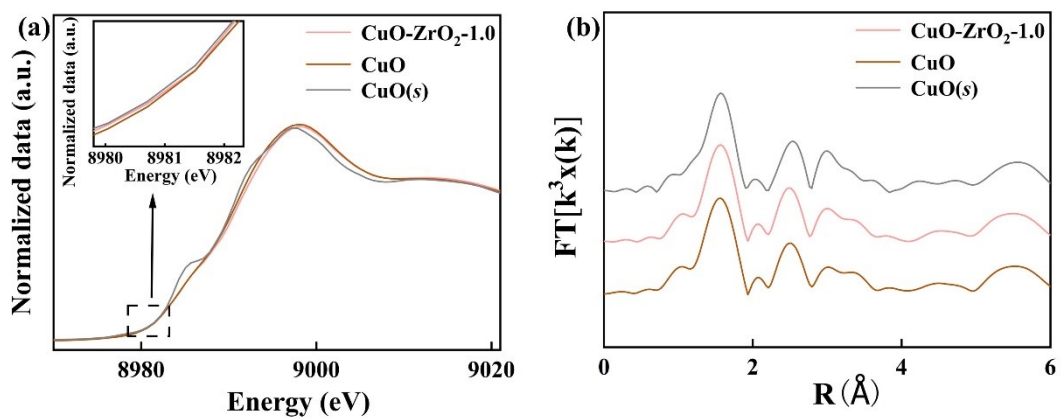

**Supplementary Figure 9.** Normalized Cu K-edge XANES spectra (a) and Fourier transforms of Cu K-edge EXAFS spectra (b) for CuO-ZrO<sub>2</sub>-1.0 and CuO. Commercialized CuO nanoparticles were included as reference.

**Supplementary Table S1.** Normalized atomic proportion of CuO-ZrO<sub>2</sub> and CuO measured by XPS spectroscopy.

| Catalyst                  | Normalized atomic proportion |       |       |
|---------------------------|------------------------------|-------|-------|
|                           | Cu                           | Zr    | O     |
| CuO-ZrO <sub>2</sub> -3.0 | 33.81                        | 5.81  | 60.38 |
| CuO-ZrO <sub>2</sub> -1.0 | 19.94                        | 11.28 | 68.78 |
| CuO-ZrO <sub>2</sub> -0.5 | 14.68                        | 14.29 | 71.03 |
| CuO                       | 47.09                        | 0     | 52.91 |

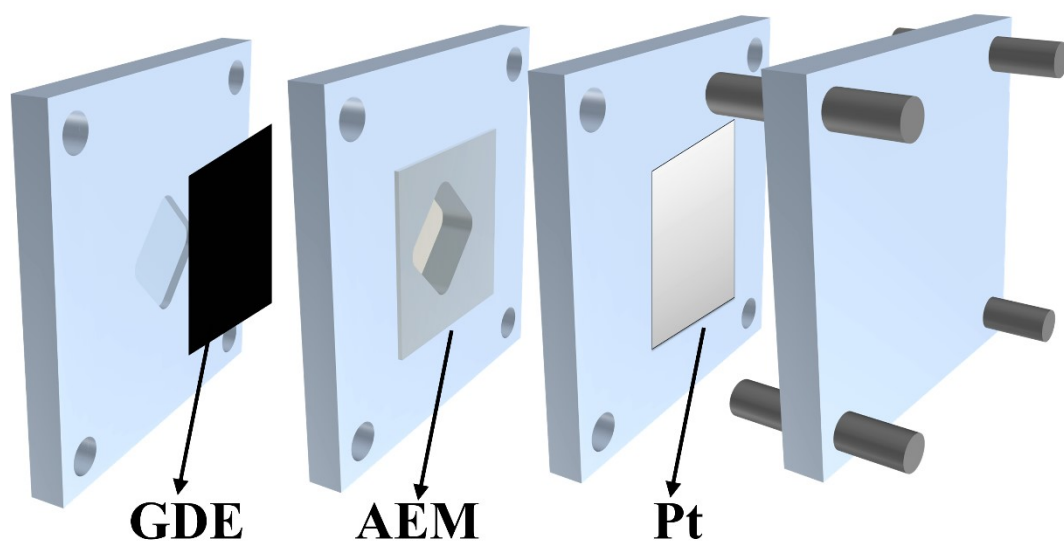

**Supplementary Figure 10.** The Schematic illustration for the flow cell.

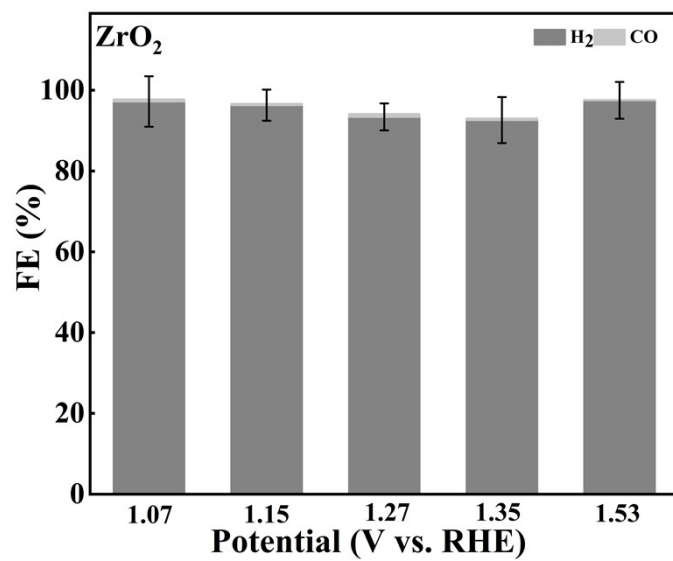

**Supplementary Figure 11.** The CO<sub>2</sub>RR products distribution over ZrO<sub>2</sub> at different bias potentials.



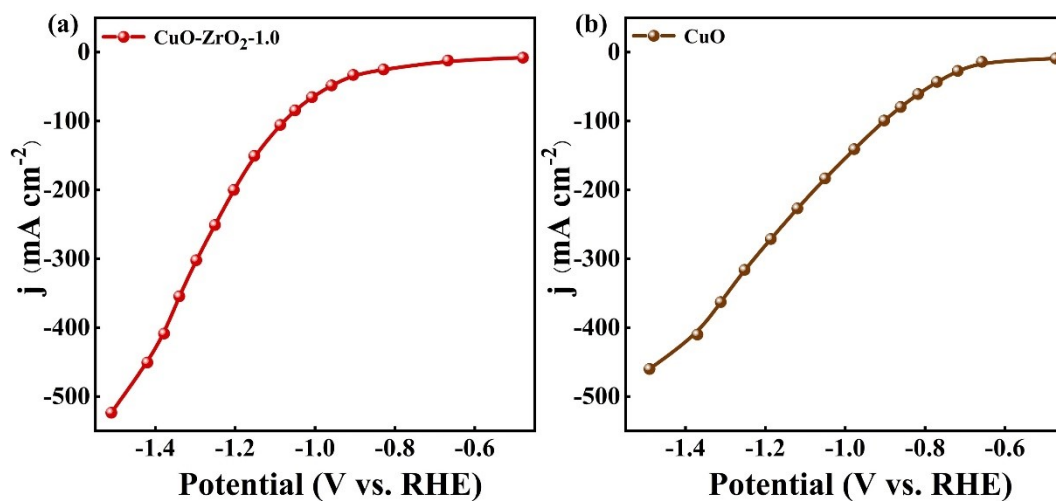

Supplementary Figure 12. The LSV curves of  $\text{CuO-ZrO}_2\text{-1.0}$  (a) and  $\text{CuO}$  (b).

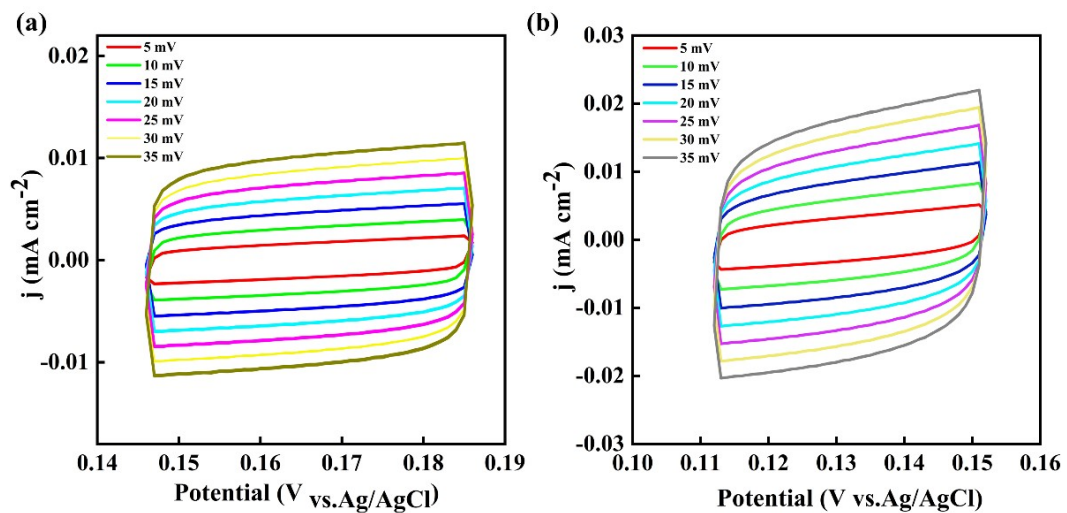

Supplementary Figure 13. CV curves of CuO-ZrO<sub>2</sub>-1.0 (a) and CuO (b).

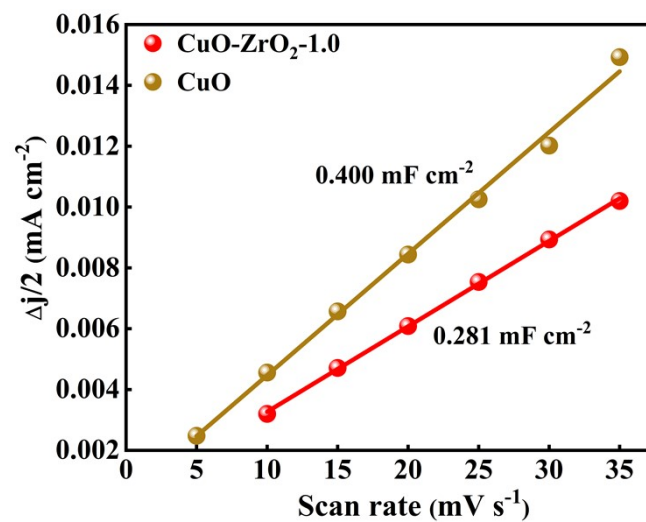

Supplementary Figure 14. Electrochemical double-layer capacitances of CuO-ZrO<sub>2</sub>-1.0 and CuO.

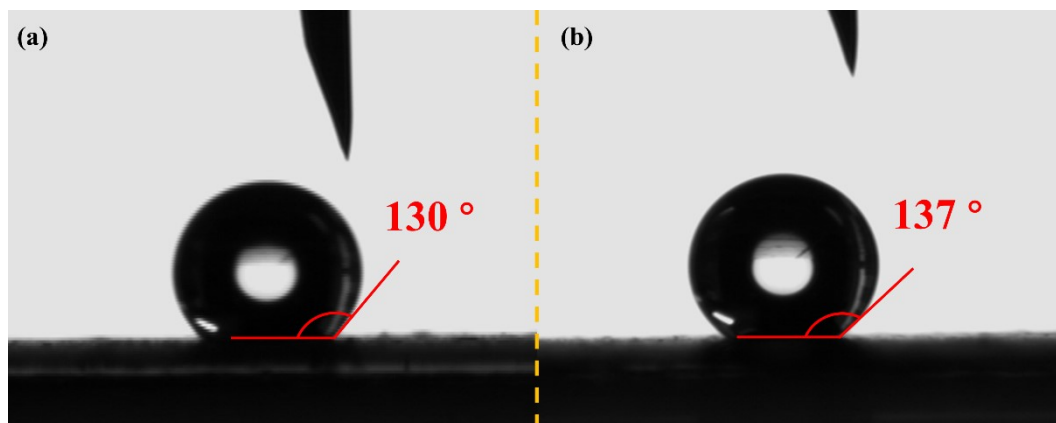

Supplementary Figure 15. Contact angle tests of CuO-ZrO<sub>2</sub>-1.0 (a) and pristine CuO (b).

**Supplementary Table S2.** Summarized CO<sub>2</sub>RR performances for C<sub>2+</sub> products over various electrocatalysts.

| Catalyst                            | Maximum C <sub>2+</sub> FE (%) | Enhancement ratio of C <sub>2+</sub> at Maximum FE | Ref.      |
|-------------------------------------|--------------------------------|----------------------------------------------------|-----------|
| CuO-ZrO <sub>2</sub> -1             | 82.4                           | 1.73                                               | This work |
| SCO-B                               | 59.1                           | 1.68                                               | [10]      |
| Cu-12.5 nm                          | 65.7                           | 1.70                                               | [11]      |
| 5-Ag/Cu <sub>2</sub> O              | 65.0                           | 1.18                                               | [12]      |
| CuNNAs                              | 59.0                           | 1.5                                                | [13]      |
| Cu-nr/CC3                           | 76.1                           | 1.17                                               | [14]      |
| M-Cu <sub>1</sub> /Cu <sub>Np</sub> | 75.4                           | 1.67                                               | [15]      |
| Cu-poly                             | 71.08                          | 1.15                                               | [16]      |

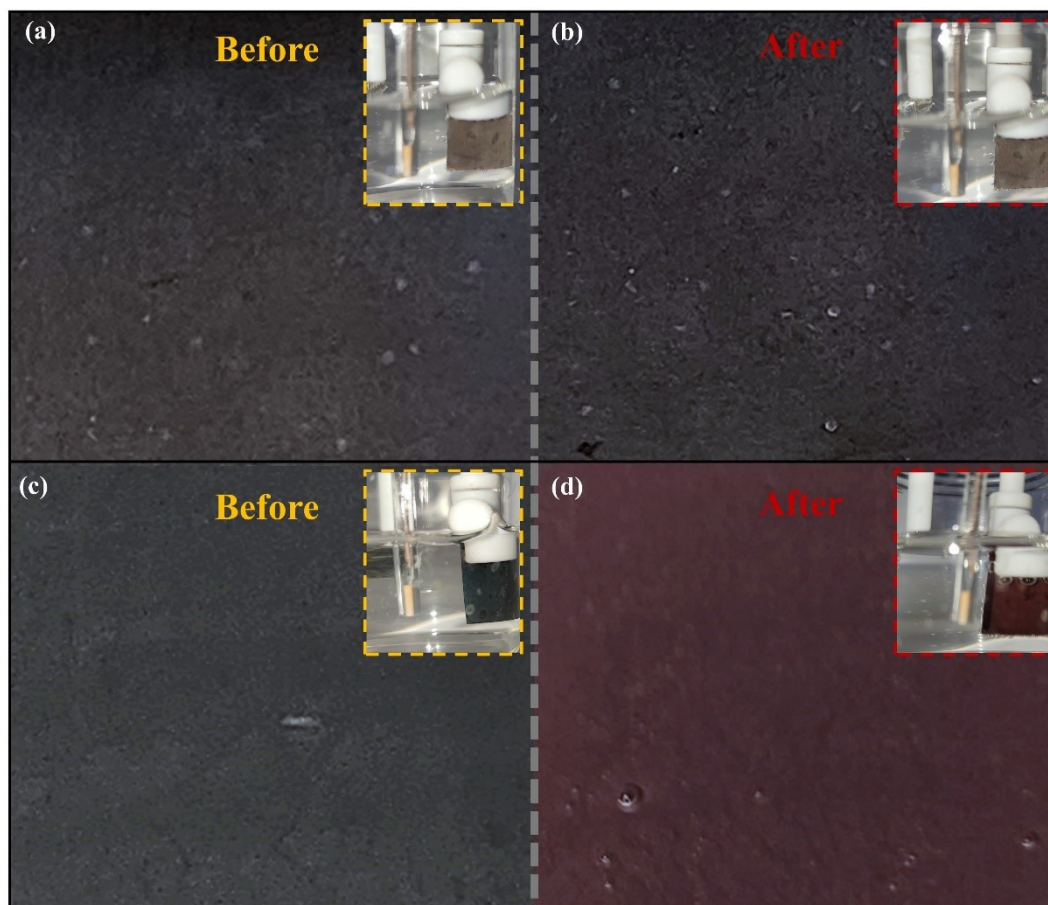

**Supplementary Figure 16.** The photographs of CuO-ZrO<sub>2</sub>-1.0 (a, b) and CuO (c, d) on gas diffusion electrode before and after CO<sub>2</sub>RR.

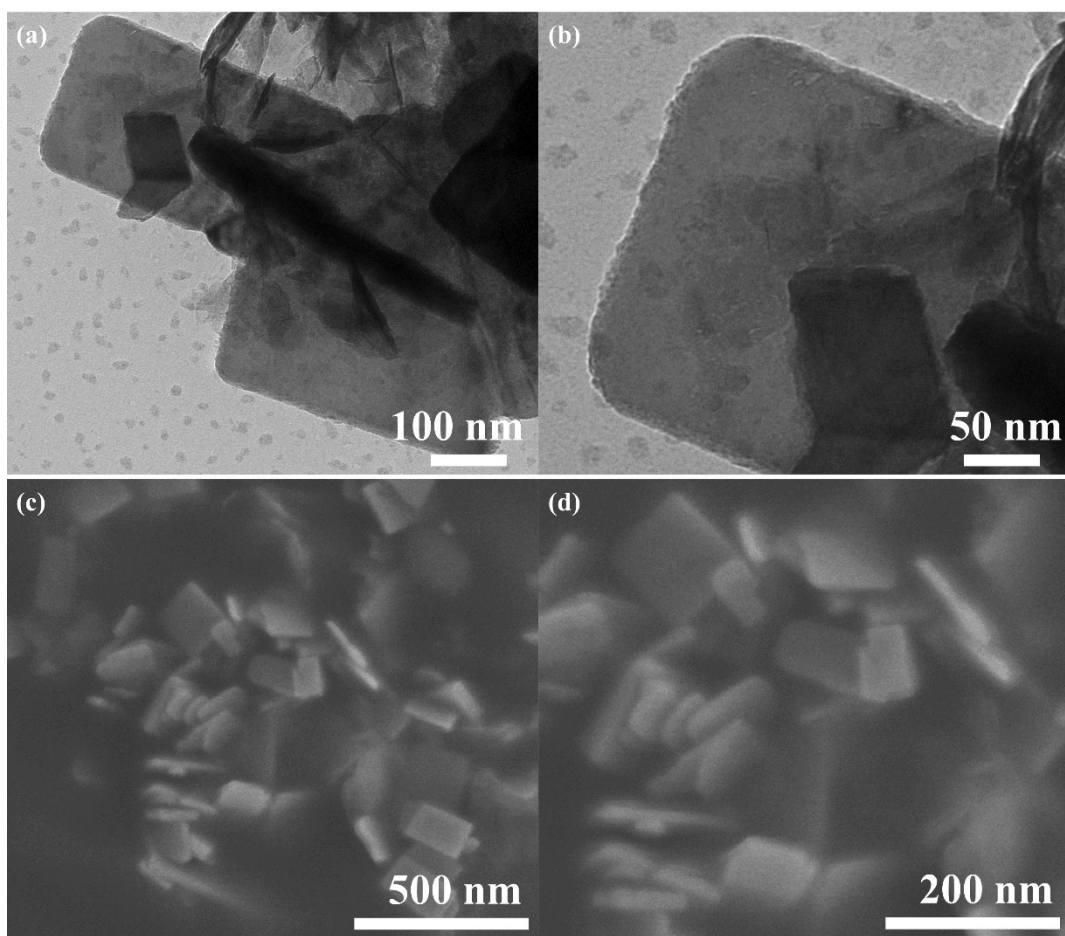

**Supplementary Figure 17.** The TEM (a, b) and SEM (c, d) images of CuO-ZrO<sub>2</sub>-1.0 after CO<sub>2</sub>RR (100 mA cm<sup>-2</sup> for 20 min).

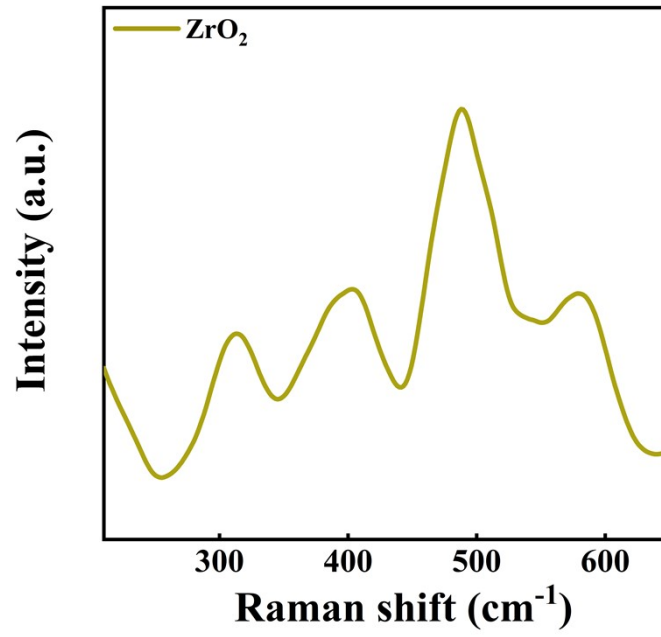

Supplementary Figure 18. The Raman spectrum of ZrO<sub>2</sub> in air.



**Supplementary Table S3.** Peak area of Cu<sup>+</sup>/Cu<sup>0</sup> over CuO-ZrO<sub>2</sub>-1 and CuO after reaction.

| Catalyst                | Peak area of Cu <sup>+</sup> (a. u.) | Peak area of Cu <sup>0</sup> | The peak area ratio of Cu <sup>+</sup> to Cu <sup>0</sup> |
|-------------------------|--------------------------------------|------------------------------|-----------------------------------------------------------|
| CuO-ZrO <sub>2</sub> -1 | 51064                                | 31713                        | 1.73                                                      |
| CuO                     | 32440                                | 54077                        | 0.60                                                      |

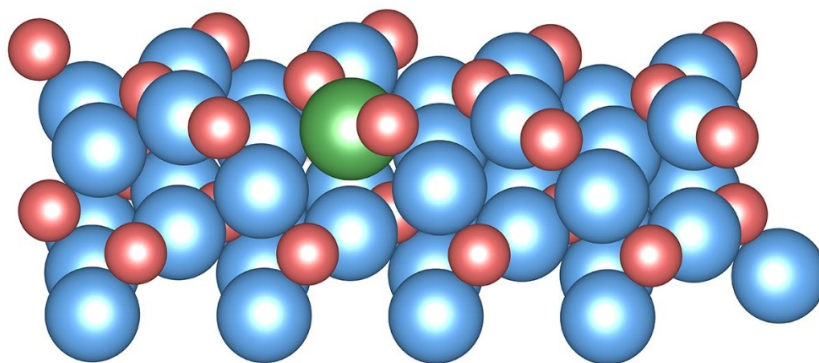

**Supplementary Figure 19.** The side view of the  $\text{Cu}_2\text{O-ZrO}_2$  surface of the modeling slab. The balls in blue, red, and green stand for Cu, O, and Zr, respectively.

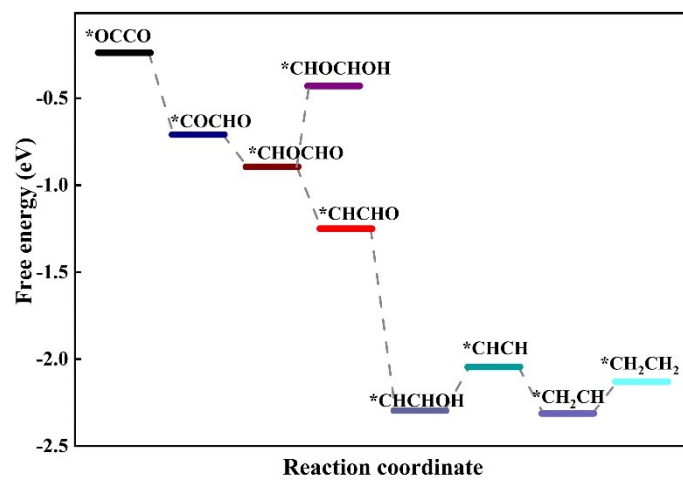

Supplementary Figure 20. Other C<sub>2</sub>H<sub>4</sub> pathways over the Cu<sub>2</sub>O-ZrO<sub>2</sub>.

## Supporting references

- [1] G. Kresse, J. Furthmuller, *Comput. Mater. Sci.*, 1996, **6**, 15–50.
- [2] G. Kresse, J. Furthmuller, *Phys. Rev. B*, 1996, **54**, 11169–11186.
- [3] J. P. Perdew, K. Burke, M. Ernzerhof, *Phys. Rev. Lett.*, 1996, **77**, 3865–3868.
- [4] P. E. Blöchl, *Phys. Rev. B*, 1994, **50**, 17953-17979.
- [5] M. Yu, D. R. Trinkle, *J. Chem. Phys.*, 2011, **134**, 064111.
- [6] E. Sanville, S. D. Kenny, R. Smith, G. Henkelman, *J. Comput. Chem.*, 2007, **28**, 899-908.
- [7] H. J. Monkhorst, J. D. Pack, *Phys. Rev. B*, 1976, **13**, 5188-5192.
- [8] G. Makov, M. C. Payne, *Phys. Rev. B*, 1995, **51**, 4014-4022.
- [9] J. Neugebauer, M. Scheffler, *Phys. Rev. B*, 1992, **46**, 16067-16080.
- [10] X. K. Lu, B. Lu, H. Li, K. Lim, L. C. Seitz, *ACS Catal.*, 2022, **12**, 6663-6671.
- [11] Z. Chen, Y. Song, Z. Zhang, Y. Cai, H. Liu, W. Xie, D. Deng, *J. Energy Chem.*, 2022, **74**, 198-202.
- [12] A. Herzog, A. Bergmann, H. S. Jeon, J. Timoshenko, S. Köhl, C. Rettenmaier, M. Lopez Luna, F. T. Haase, B. Roldan Cuenya, *Angew. Chem. Int. Ed.*, 2021, **60**, 7426-7435.
- [13] Y. Zhou, Y. Liang, J. Fu, K. Liu, Q. Chen, X. Wang, H. Li, L. Zhu, J. Hu, H. Pan, M. Miyauchi, L. Jiang, E. Cortés, M. Liu, *Nano Lett.*, 2022, **22**, 1963-1970.
- [14] C. Chen, X. Yan, Y. Wu, S. Liu, X. Zhang, X. Sun, Q. Zhu, H. Wu, B. Han, *Angew. Chem. Int. Ed.*, 2022, **61**, e202202607.
- [15] J. Feng, L. Zhang, S. Liu, L. Xu, X. Ma, X. Tan, L. Wu, Q. Qian, T. Wu, J. Zhang, X. Sun, B. Han, *Nat. Commun.*, 2023, **14**, 4615.
- [16] T. Zhao, X. Zong, J. Liu, J. Chen, K. Xu, X. Wang, X. Chen, W. Yang, F. Liu, M. Yu, F. Cheng, *Appl. Catal., B*, 2024, **340**, 123281.
